# Supplementary material for: Attenuation of Liver Injury via Bicyclol–Bovine Serum Albumin Nanopreparation using a Green Synthetic Approach
Source: Hindawi journal article supplement (doi:10.1155/2022/7740768), 2022-01-01
Supplement: f1 [file 7740768.f1.docx]

Supporting Information

Attenuation of Liver Injury via Bicyclol-Bovine Serum Albumin Nanopreparation Using a Green Synthetic Approach

Abstract

Bicyclol (BIC) is a traditional anti-hepatitis drug that is used to treat chronic hepatitis B infections by improving liver function and reducing transaminase levels. Because the extensive use of BIC for treating liver injury is limited by its poor bioavailability, the course of treatment with oral BIC lasted for >6 months. This study aimed to develop a nano-BIC injection to improve its bioavailability and anti-hepatitis efficacy. We used a green synthetic approach to prepare BIC-bovine serum albumin (BSA) nanoparticles (BIC-NPs). Moderate protein denaturation is required to release free thiol groups in the intramolecular reactions of BSA, which may form an intermolecular disulphide network to stabilise the BIC-BSA nanoassembly. Our results showed that the administration of BIC-NPs in rats resulted in a 2.42-fold increase in drug concentration in plasma. Further, nano-BIC injection showed high bioavailability and rapidly achieved therapeutic concentrations. BIC can restore mitochondrial function by scavenging reactive oxygen species. Moreover, we observed that 70-nm NPs can accumulate in the liver, and the nano-BIC injection protected mice from methotrexate-induced liver injury. This study provides an improved strategy for developing a liver-protecting agent to meet various clinical needs of patients.

Keywords: Bicyclol, liver injury, protein nanoparticles, green-synthetic, ROS

**
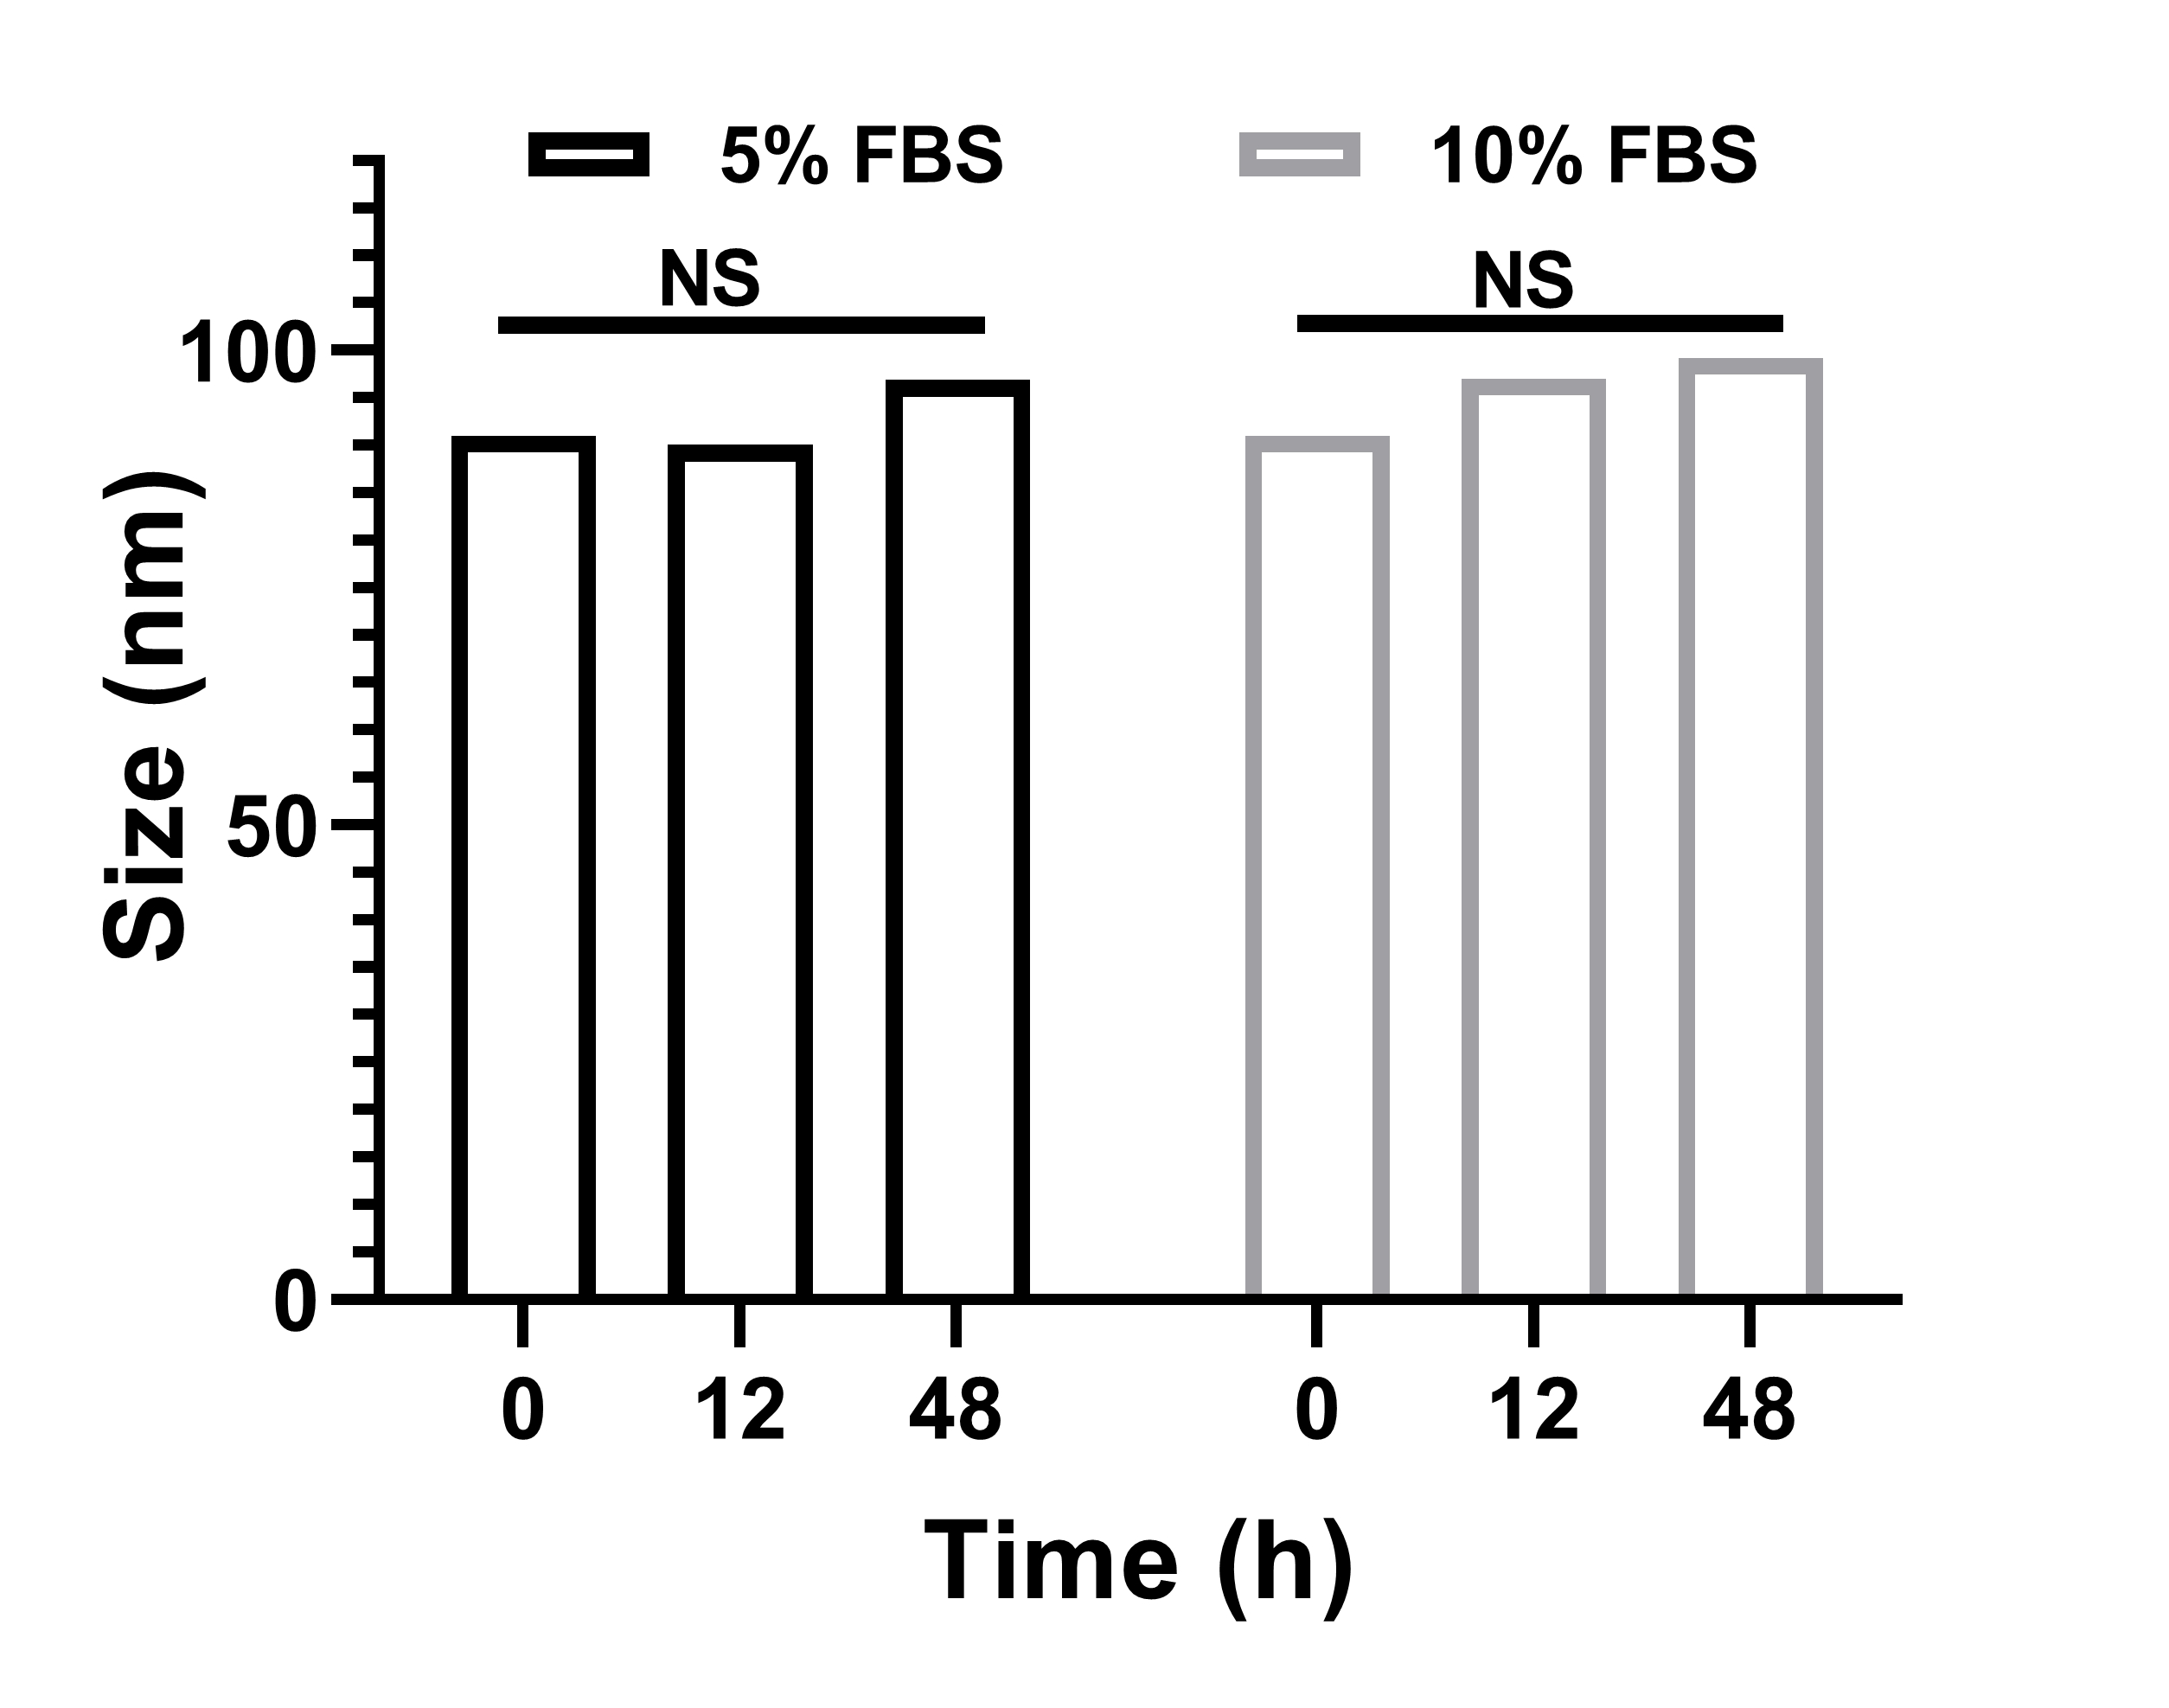
**

**Supplemental Figure 1. The stability of BIC-NPs in FBS from 0 h to 48 h**. To evaluate the biostability of BIC-NPs, their size changes in 5% FBS and 10% FBS at room temperature from 0 to 48 h were measured by DLS at different time points. The BIC-NPs did not disassemble in 5% and 10% FBS in 0~48 h. NS represents no statistical difference (P > 0.05).

**
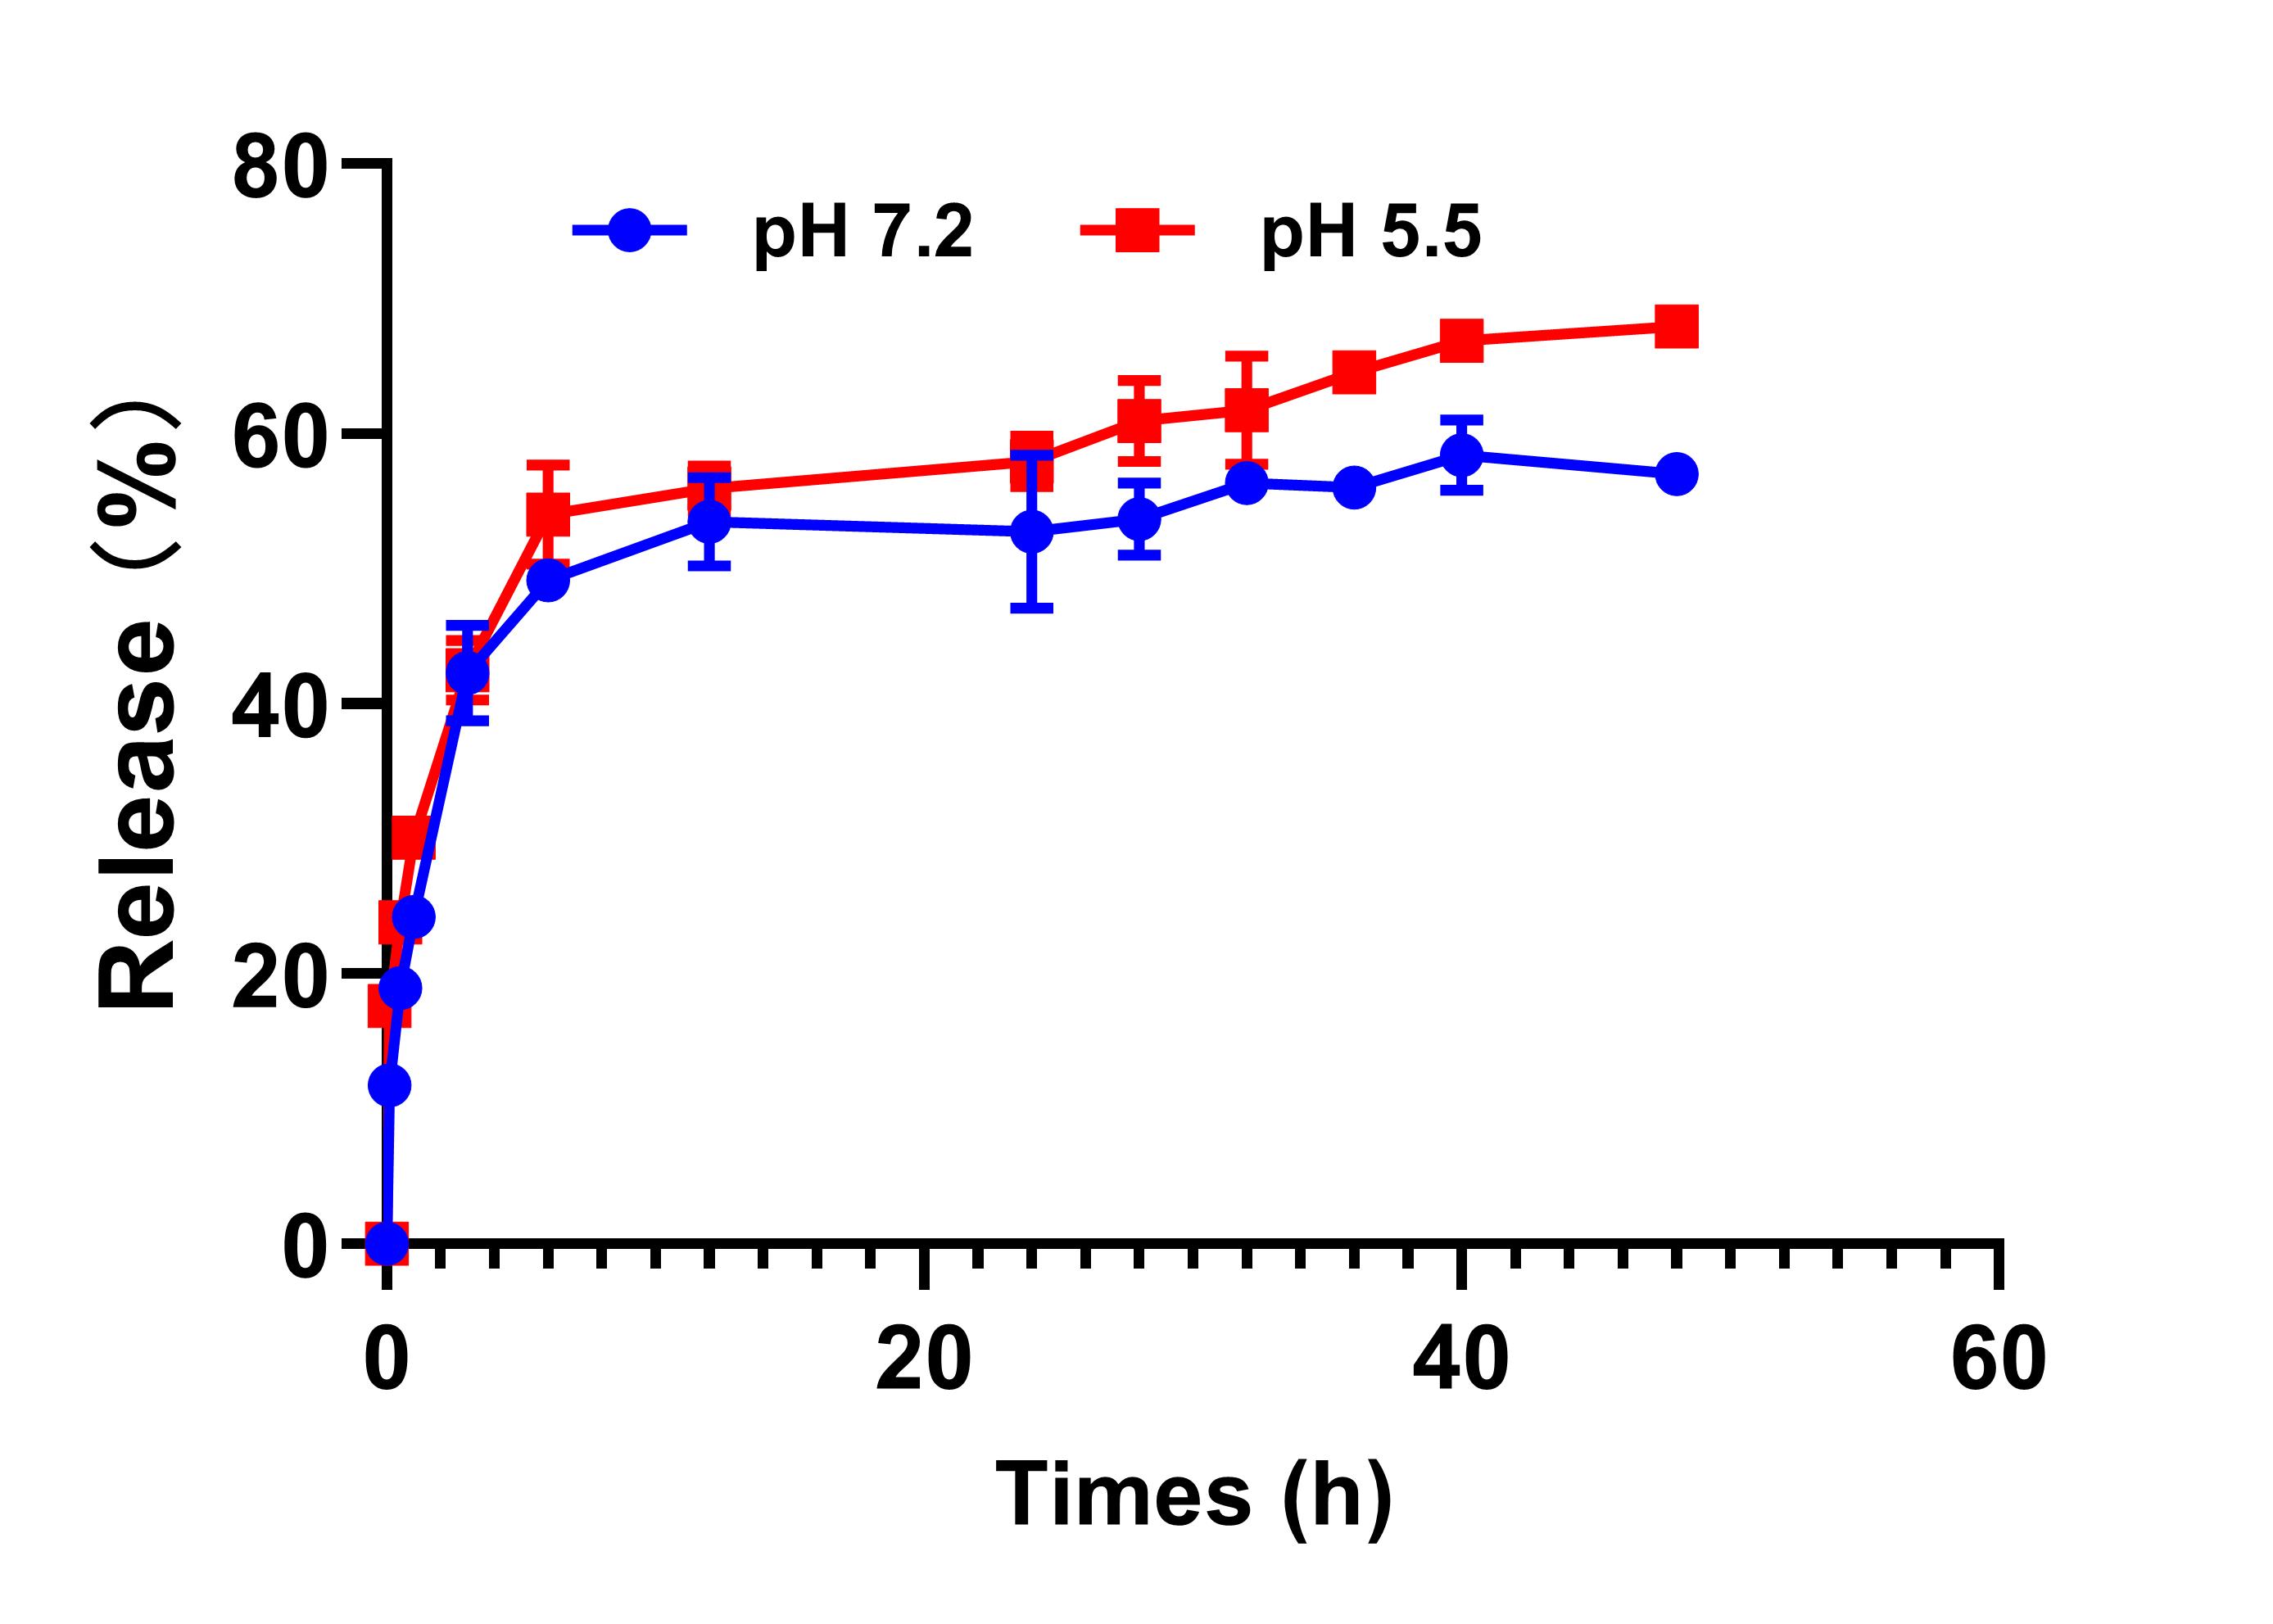
**

**Supplemental Figure 2. Stability and release analysis of BIC-NPs.** Cumulative release (0~48 h) percent of BIC from BIC-NPs in PBS release medium (pH=7.2 and pH=5.5).


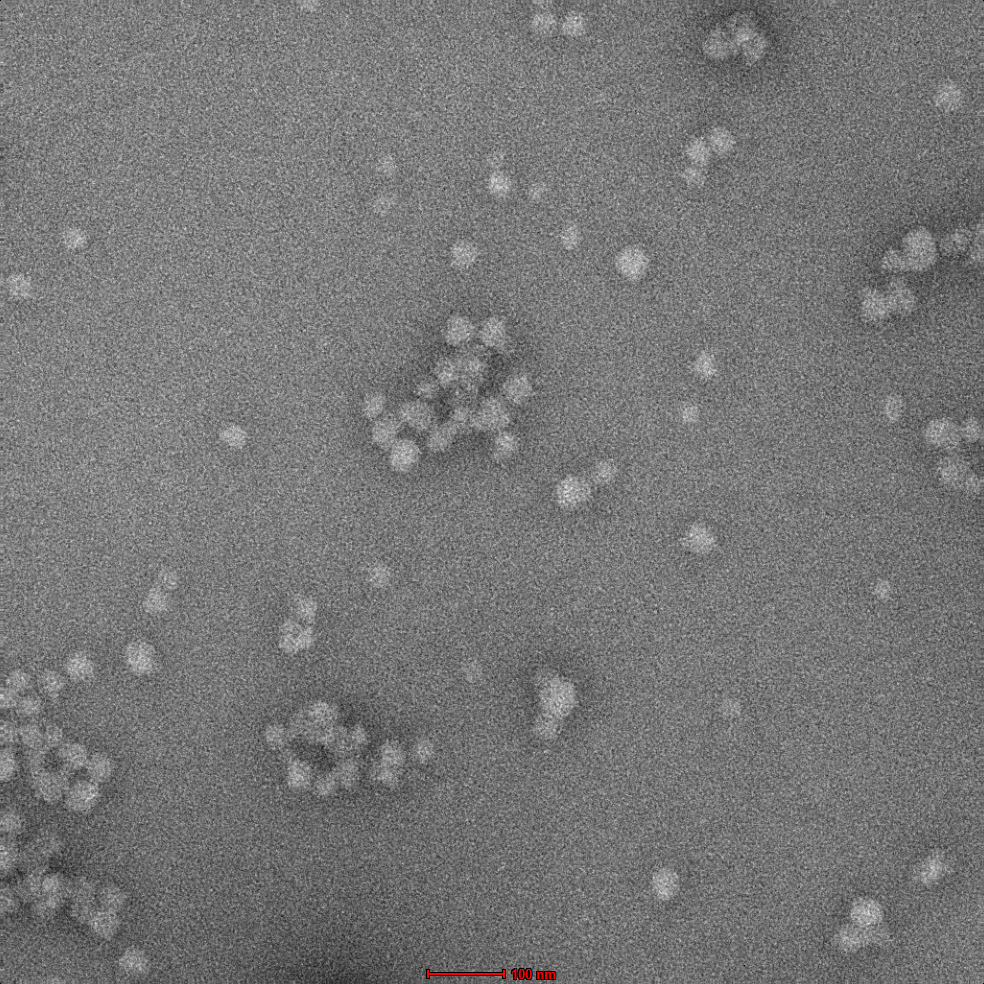


**100 nm**

**Supplemental Figure 3.** Transmission emission microscopy (TEM) image of BIC-NPs after 90 days, bar =100 nm.

**
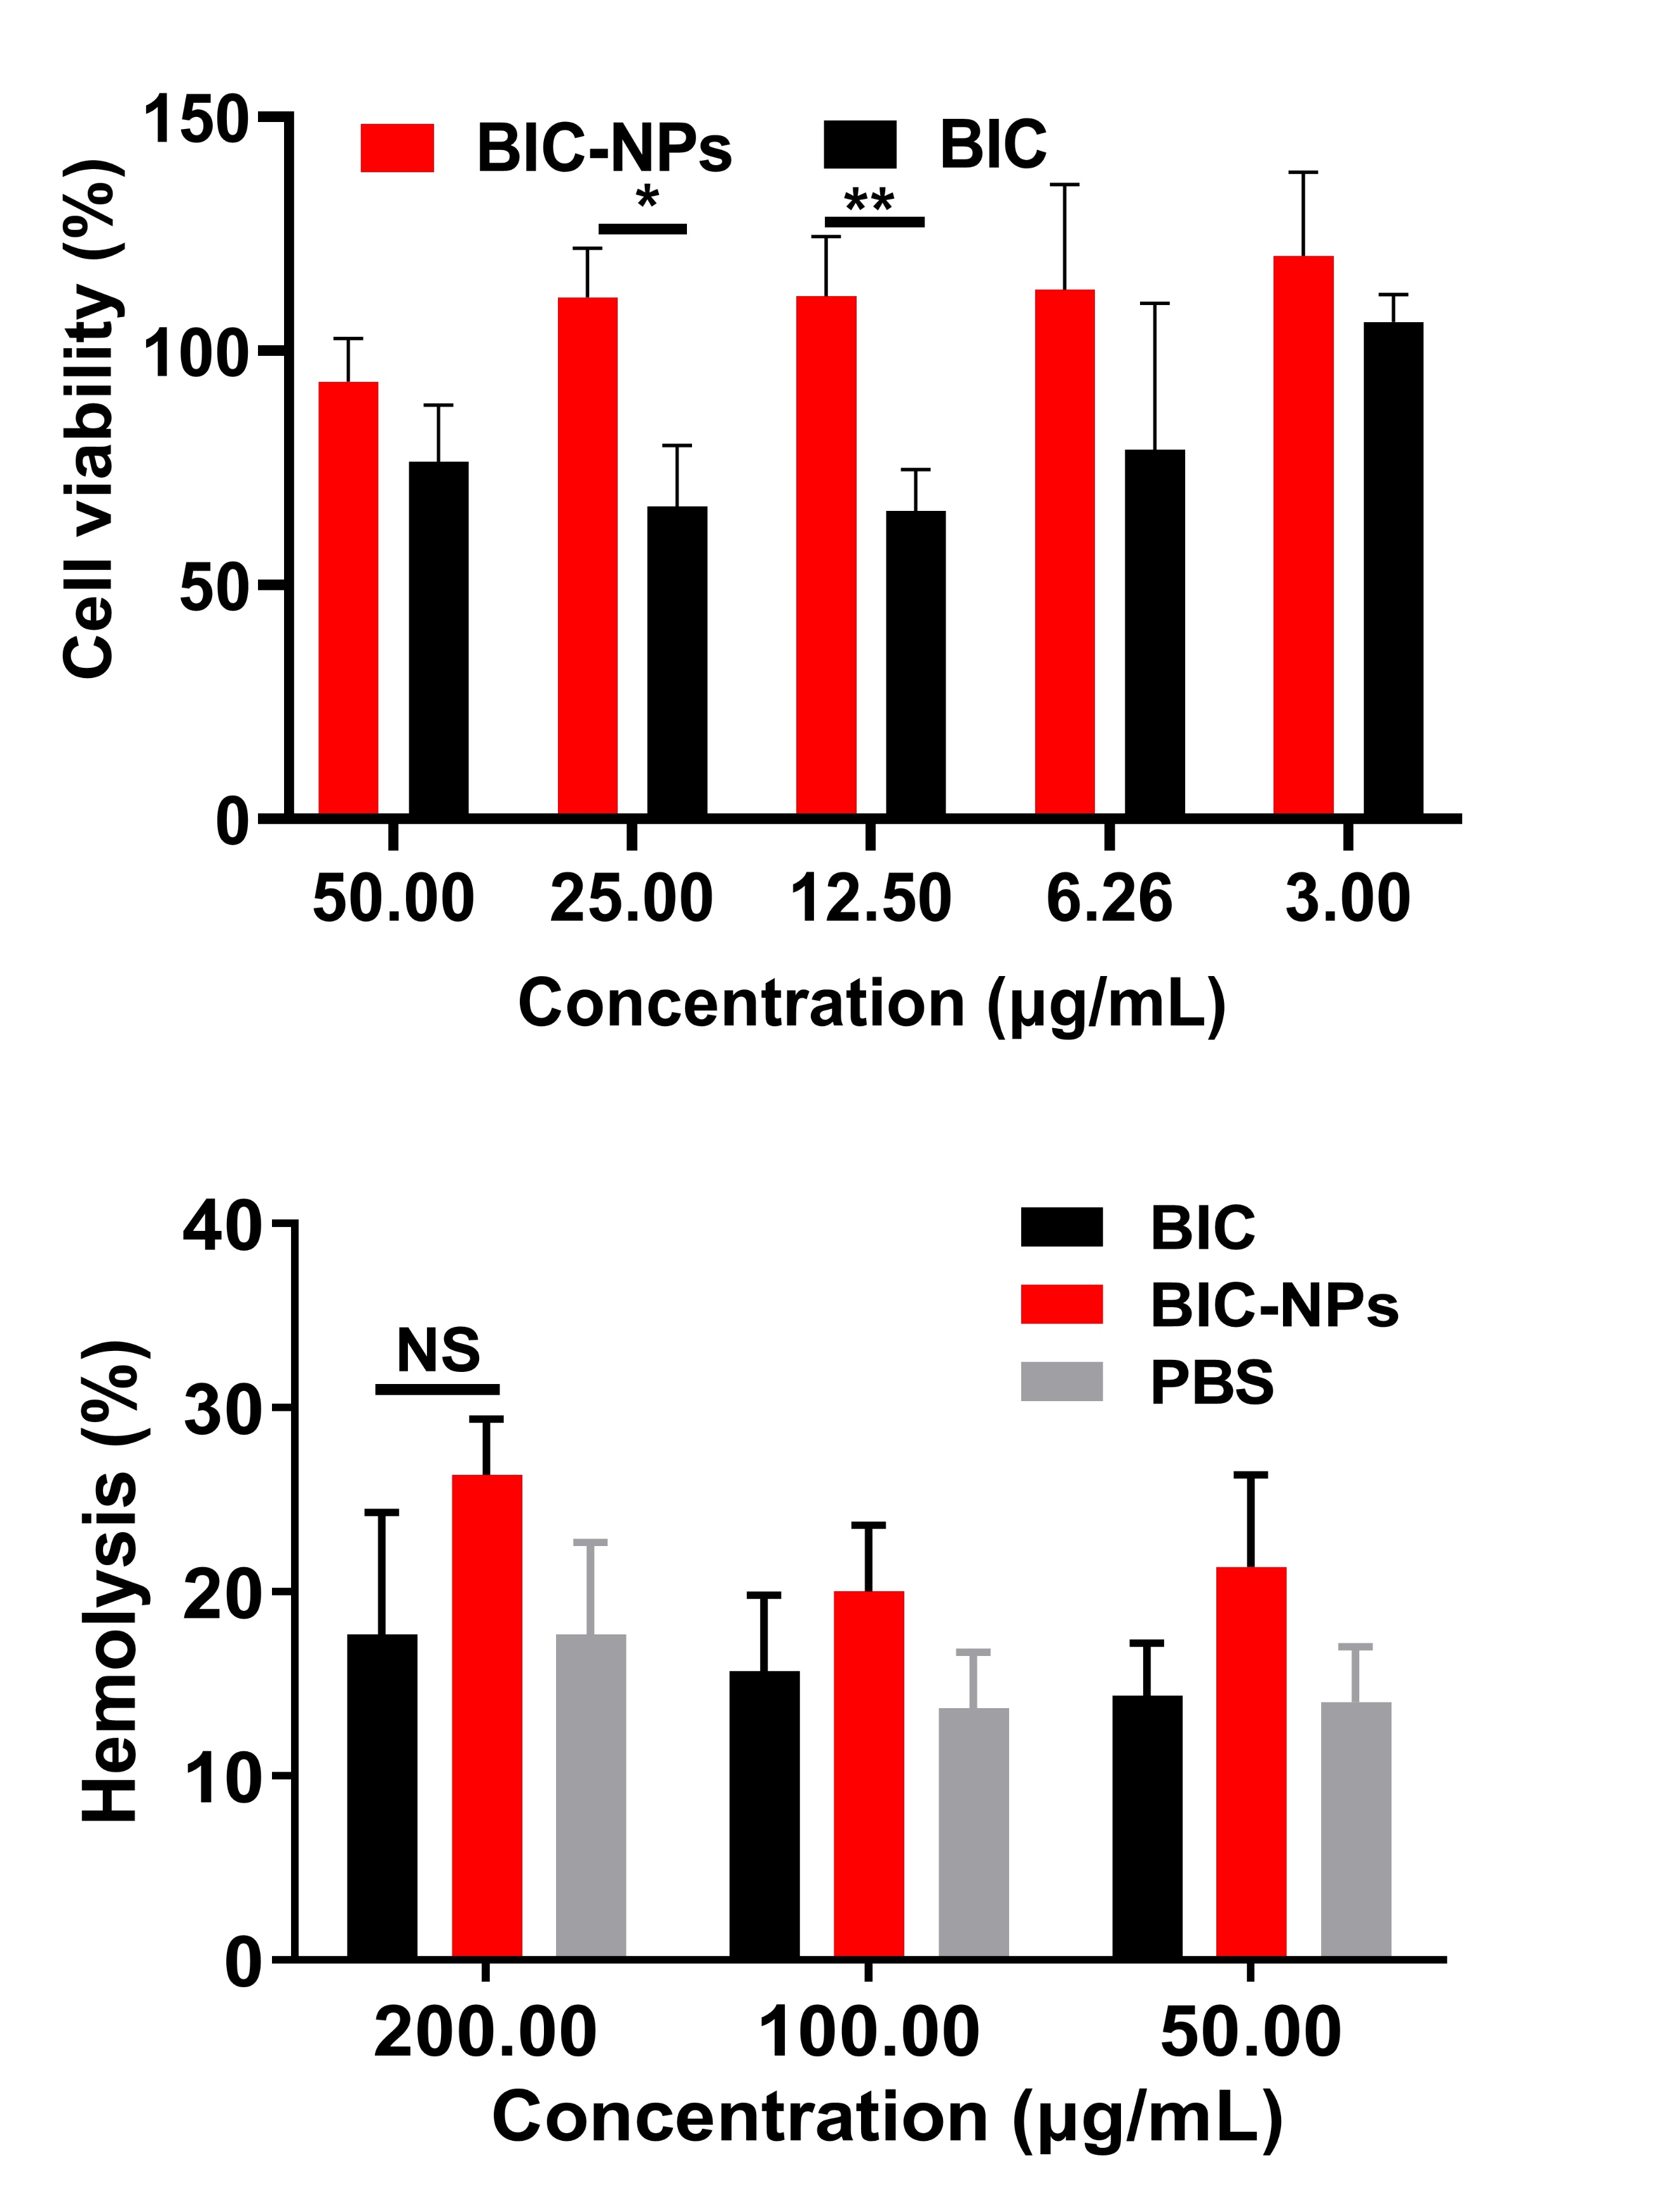
**

**Supplemental Figure 4. Safety evaluation of BIC-NPs and BIC.** Viability of RAW264.7 cells in the presence of BIC or BIC-NPs from 3 to 50 μg/mL for 12 h. Data are presented as mean ± SD (n = 3).


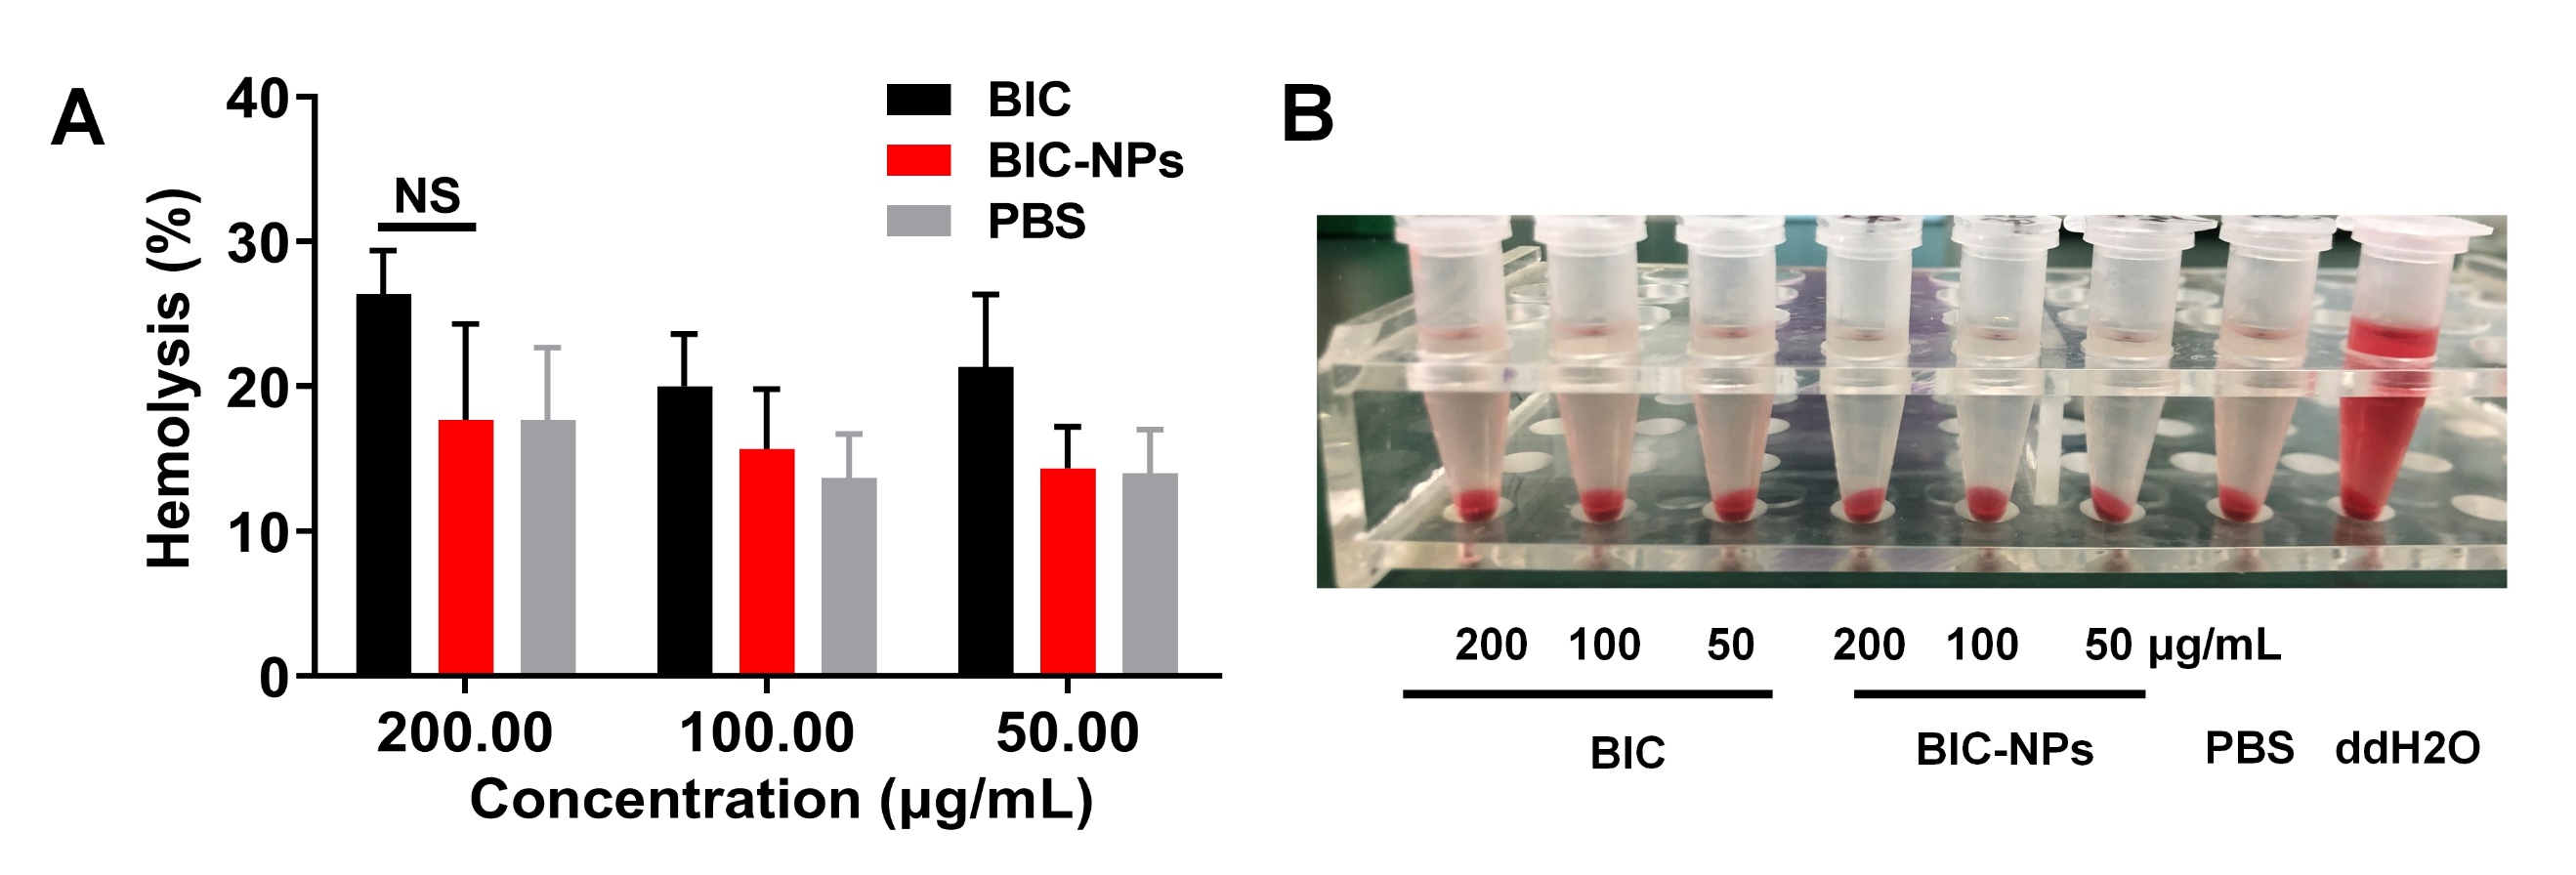


**Supplemental Figure 5.** **Hemolysis effect of BIC-NPs and BIC**.(A-B) Hemolytic of BIC and BIC-NPs on rabbit’s red cells at the indicated concentrations. dd H2O and PBS were used as the positive and negative controls, respectively. Data are presented as mean ± SD (n = 3).


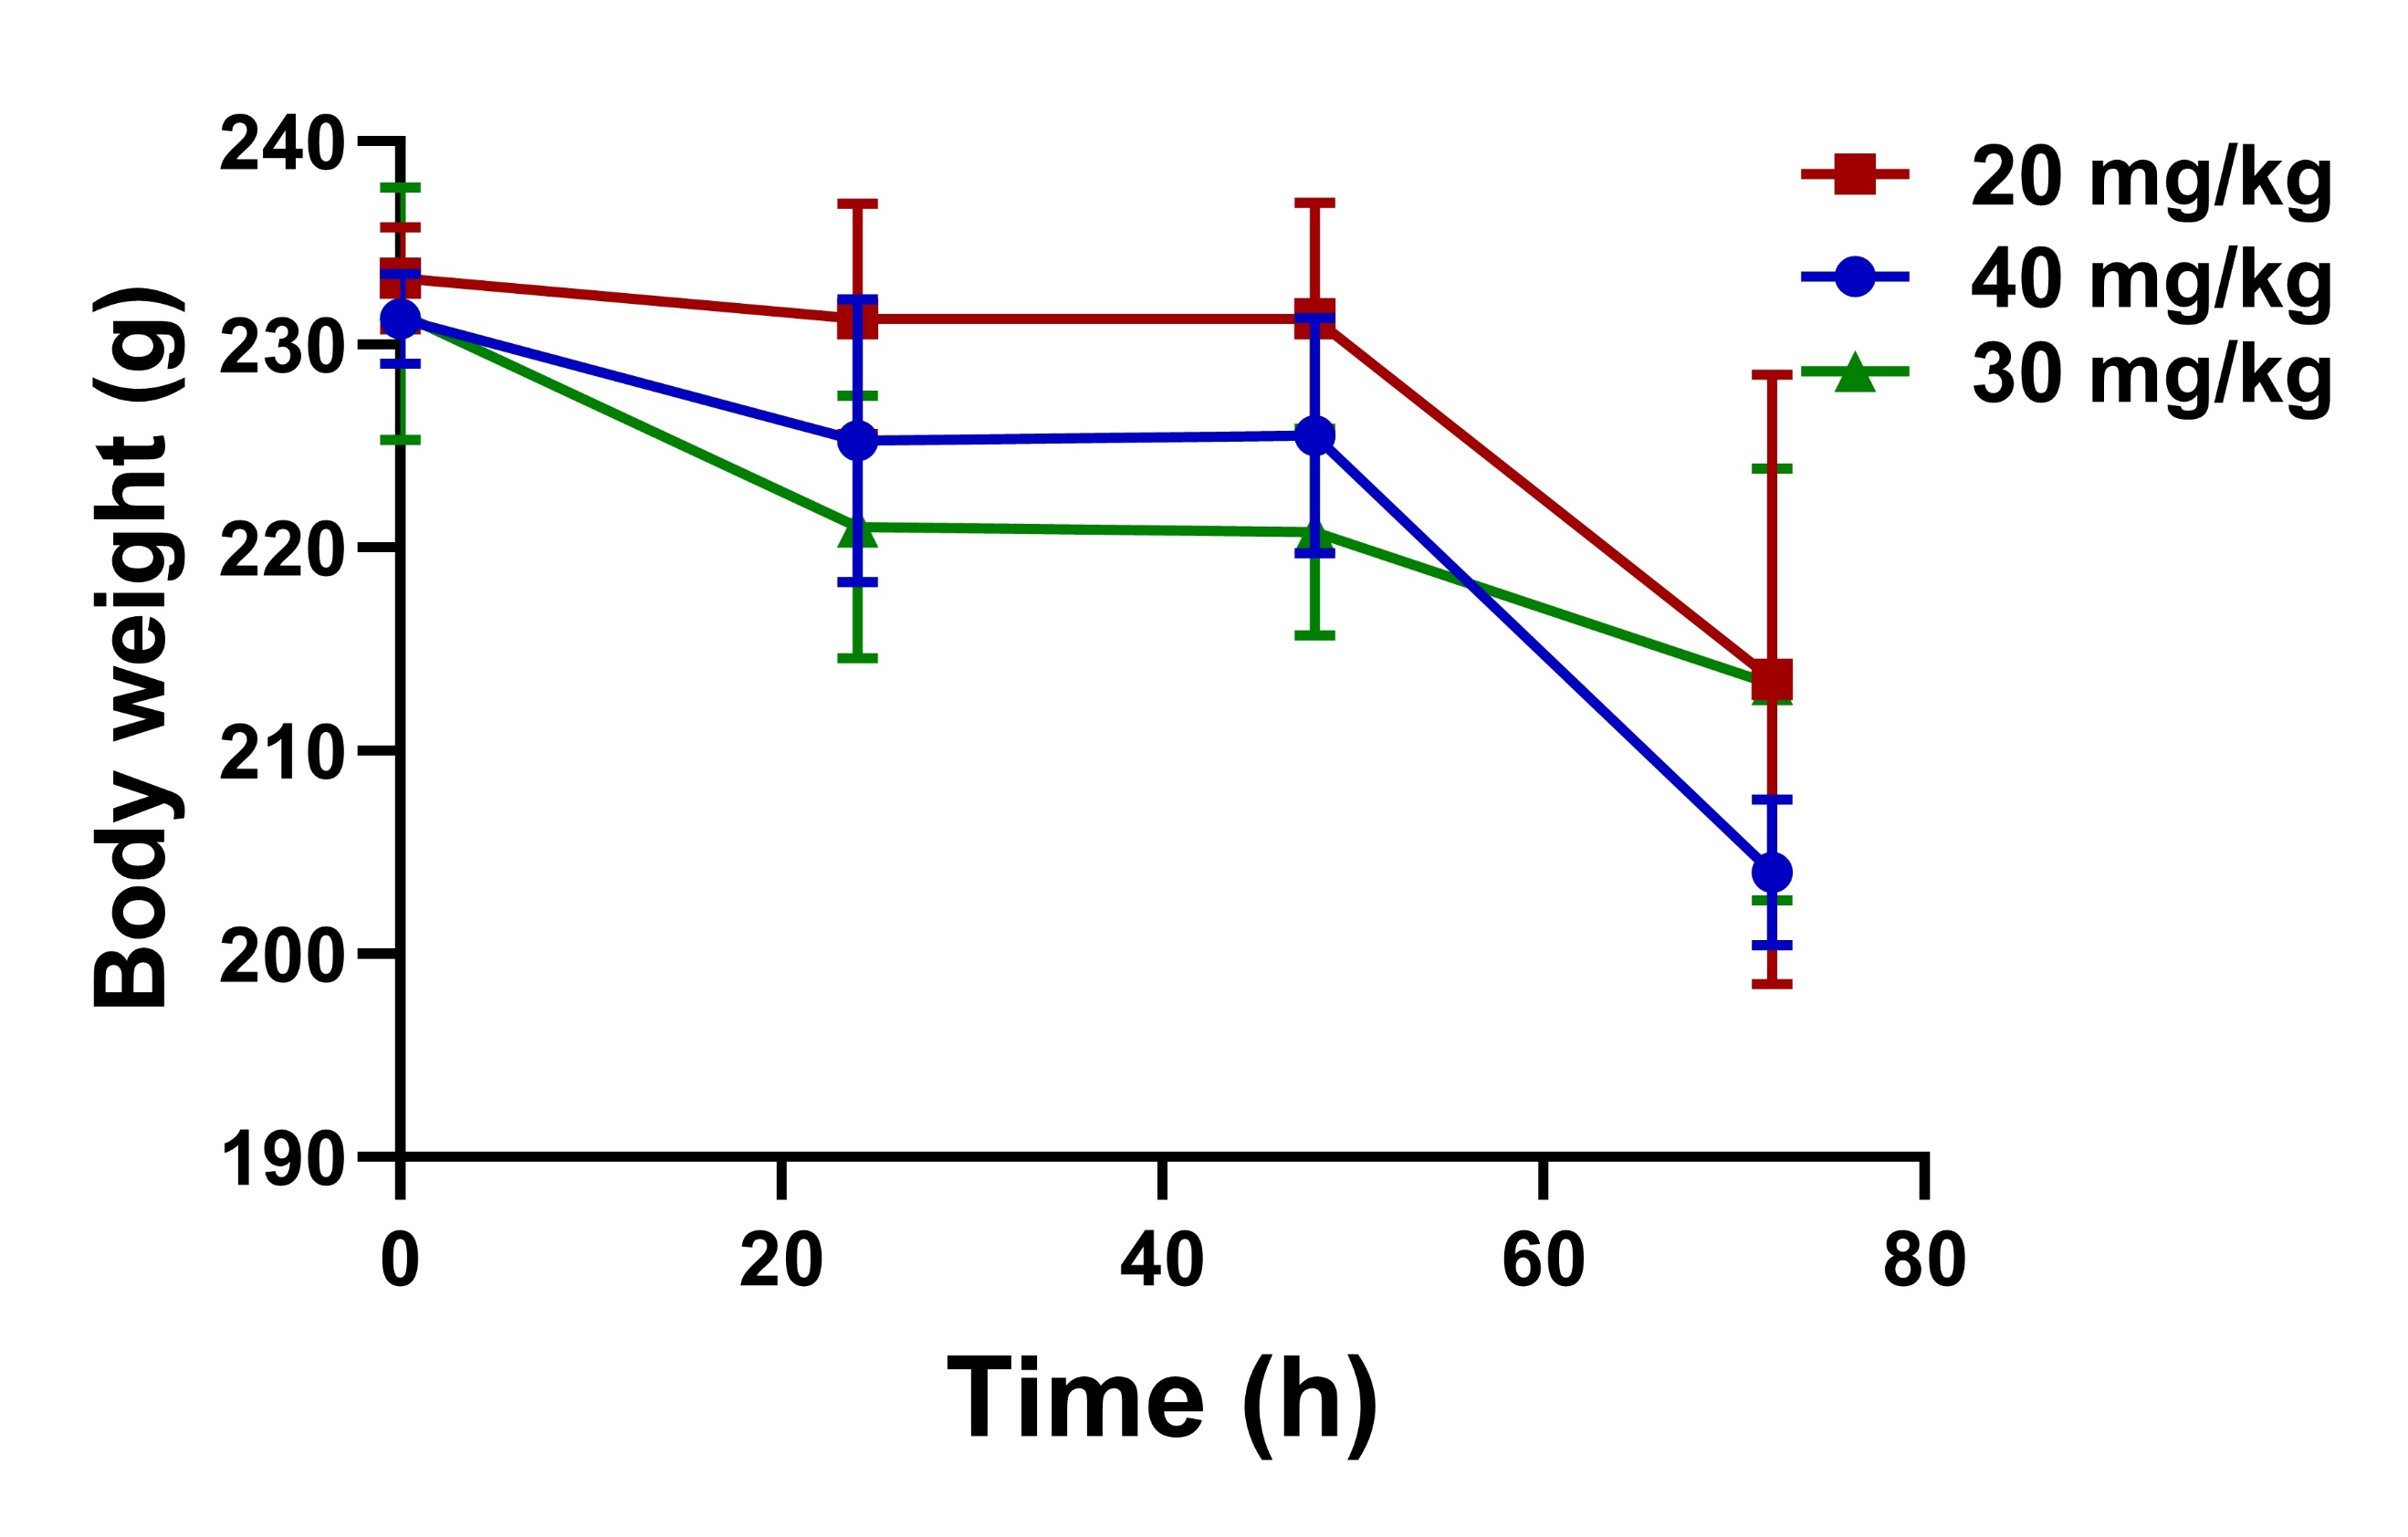


**Supplemental Figure 6. The change of body weight after 20 (L), 30 (M), 40 (H) mg/kg MTX injection in rats.** The decrease of body weight also indicated that methotrexate injection can induce damage to the liver of rats. After injection molding, the weight of rats in the three model groups decreased. Data are presented as mean ± SD (n = 5).

**Supplementary Table S1. Pharmacokinetic parameters of Bicyclol, BIC-NPs in rat after orally and intravenous (i.v.) administration.**

| Parameter | BIC | | BIC-NPs |
| --- | --- | --- | --- |
| AUC0~t (h*ng/mL) | 602.83±83.03 | | 1460.56±197.06 |
| AUC0~t /D(h*ng/mL/mg)  AUC0~∞ (h*ng/mL)  AUC0~∞ /D(h*ng/mL/mg)  Vd/F | | 120.56±16.60  1198.88±280.89  239.77±56.17  179.95±34.10 | 292.95±39.41  1783.87±478.20  356.77±95.64  43.03±11.21 |

The AUC0~t (h*ng/mL) increased 2.42-fold (1460.56 vs. 602.83 ng·h/mL), and the AUC0~∞ (h*ng/mL) increased 1.48-fold (1783.87 vs. 1198.88 h*ng/mL), Vd/F reduced 4.18-fold (43.03 vs 179.95) in the rats with liver injury.
